# Supplementary material
Source: PubMed Central journal article supplement (PMC2744970)

## SUPPLEMENTAL MATERIAL

### Figures Legend

**Figure 1.** Across increasing age groups, women and men demonstrate an increase in systolic blood pressure (Panel A), decrease in diastolic blood pressure (Panel B), and increase in pulse pressure (Panel C). Values are presented as means (95% CI).

**Figure 2.** Panels A through H show the relation of age to indices of LV structure and function by sex. P values are for interaction between age and sex. For EF, shown in Panel F, Levene's test of equality for error variances was  $<0.05$ ; therefore, the interaction between age group and hypertension status was not considered statistically significant since the P value was not  $<0.01$ .

**Figure 3.** Panels A through H show the relation of age to indices of LV structure and function by hypertension status, where the presence of hypertension is defined by  $BP \geq 140/90$  or taking anti-hypertensive medications. P values are for interaction between age and hypertension status.

Figure 1.

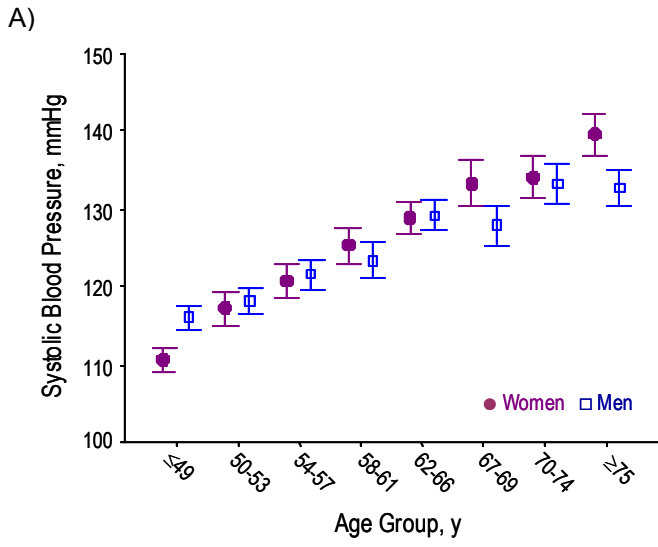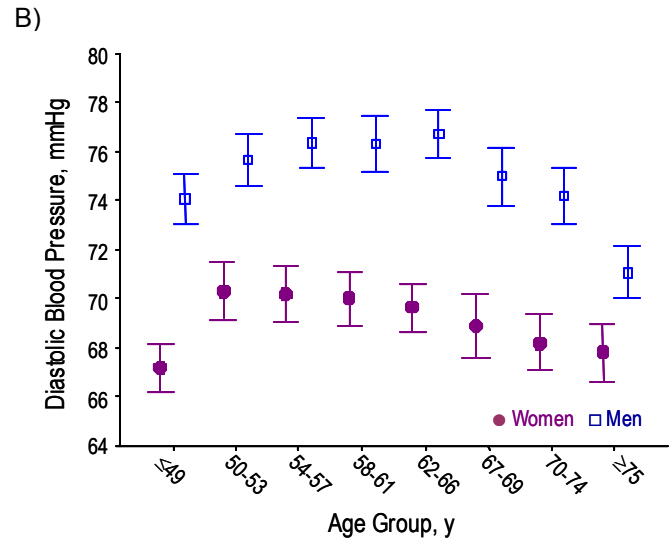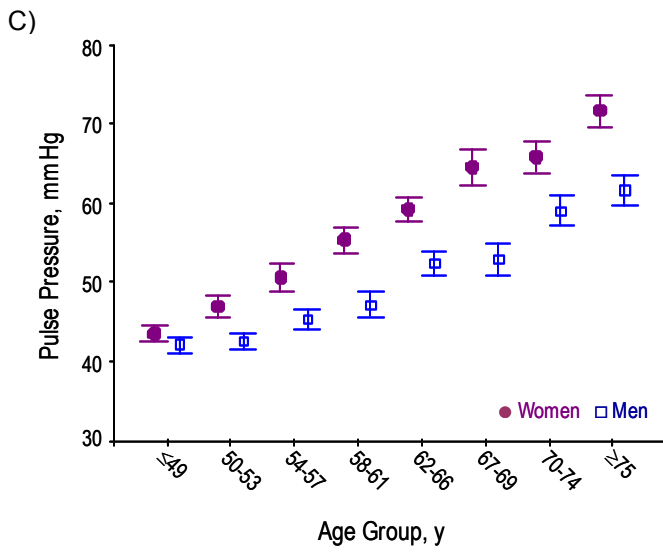

Figure 2.

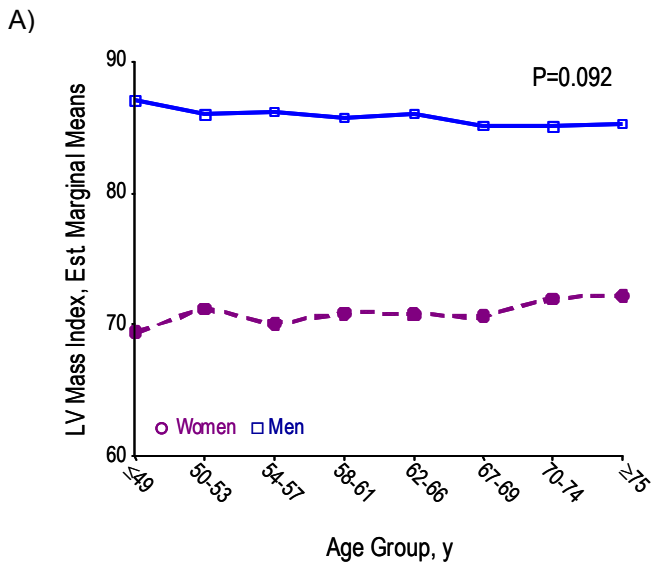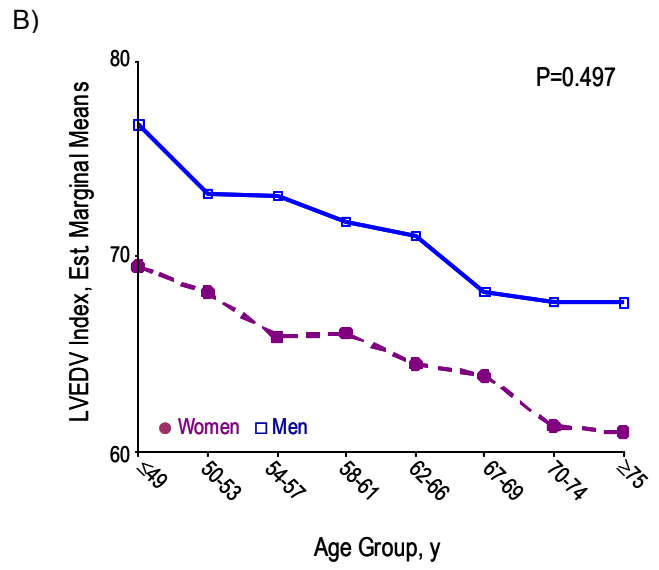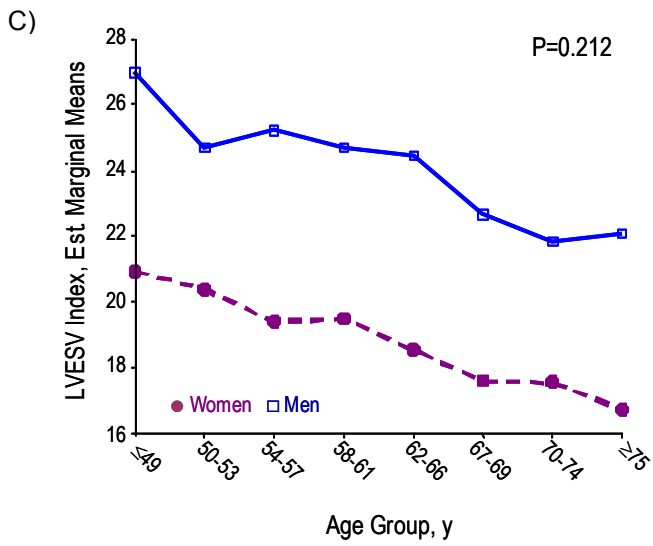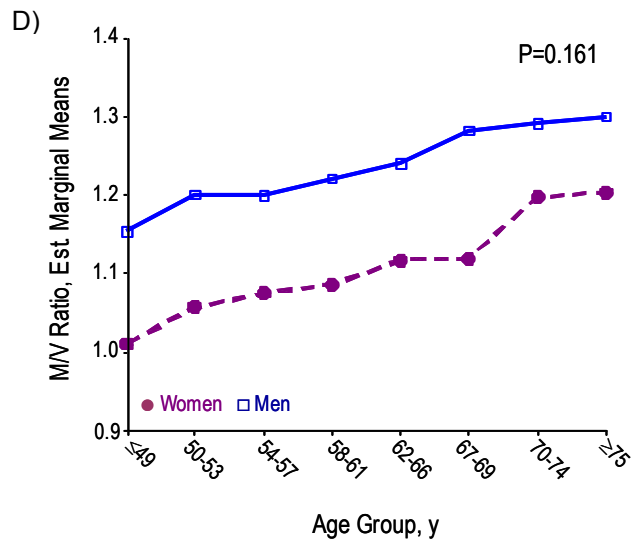

**Figure 2.** (continued)

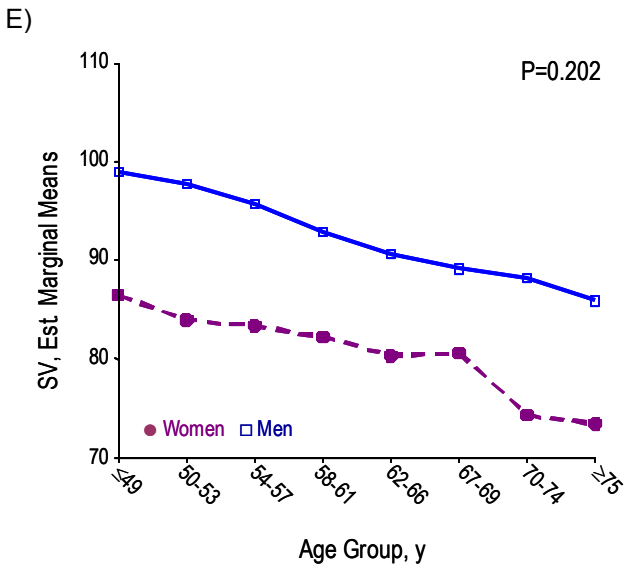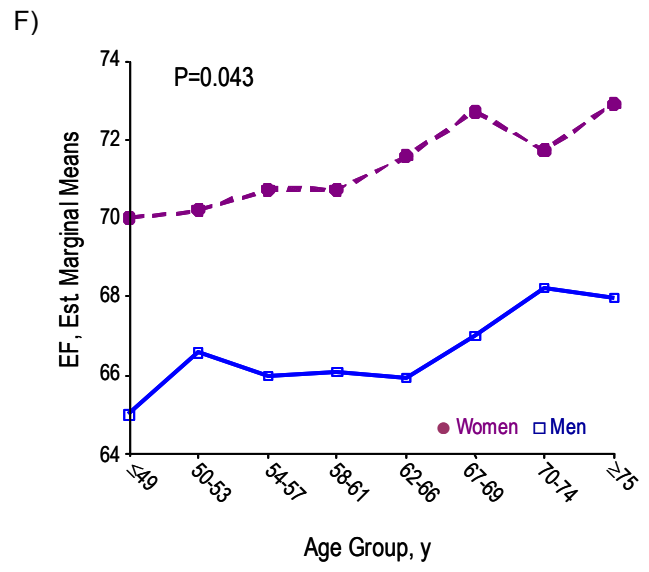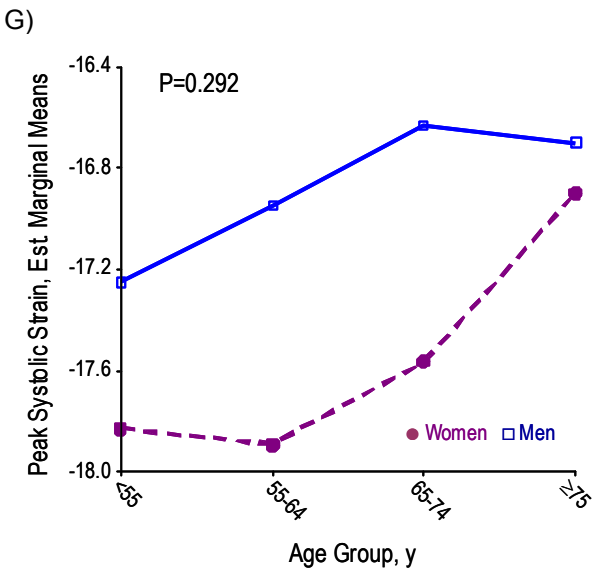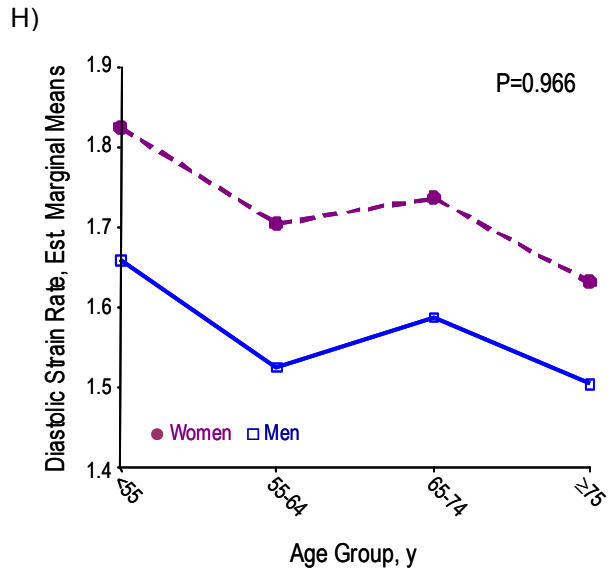

**Figure 3.**

A)

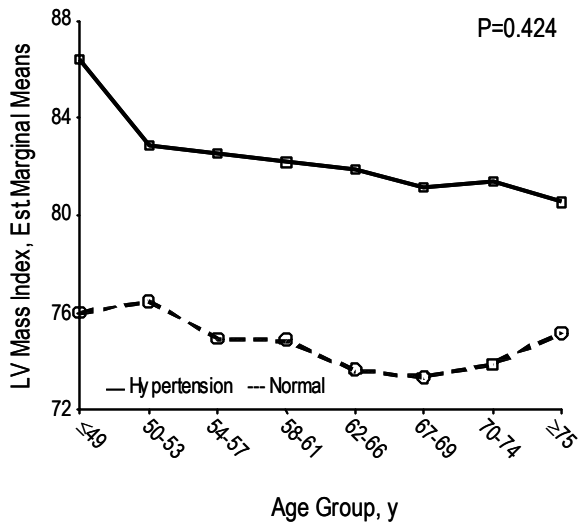

B)

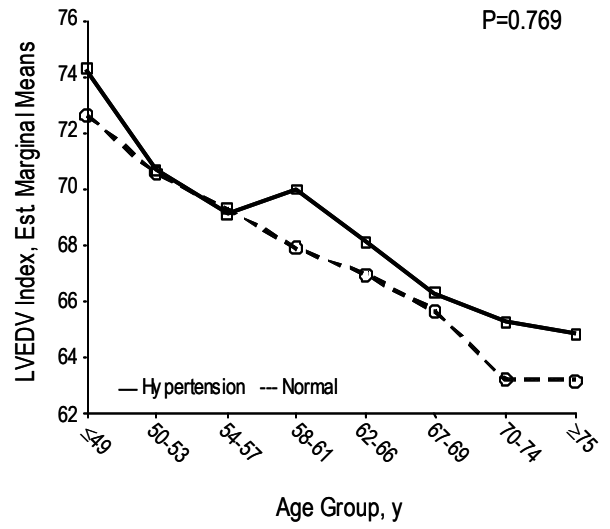

C)

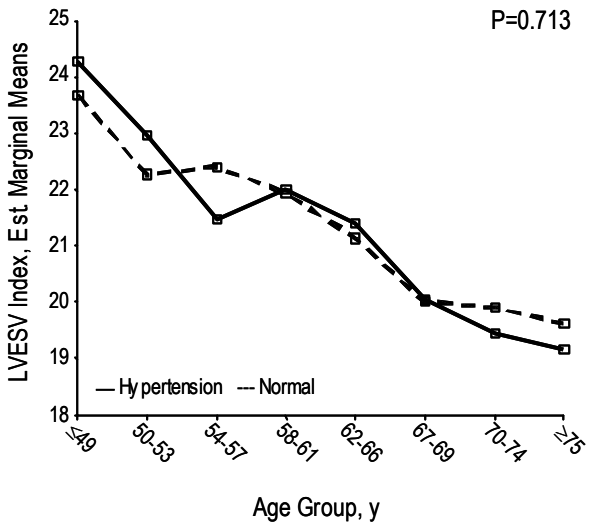

D)

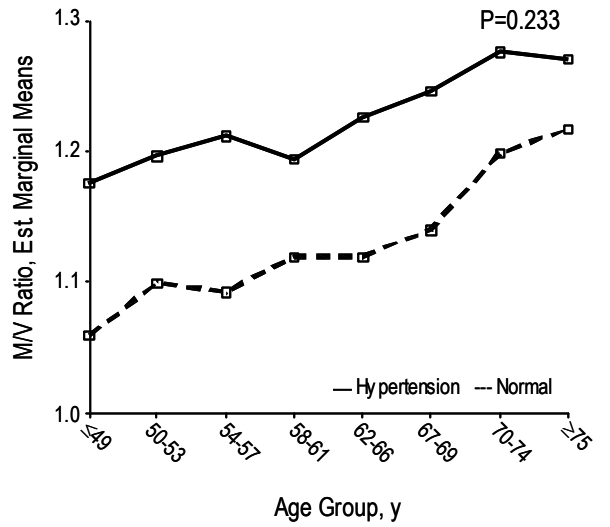

**Figure 3. (continued)**

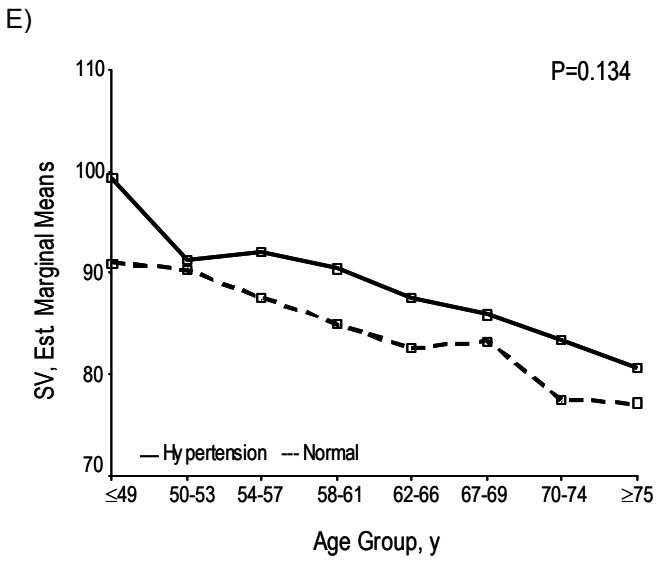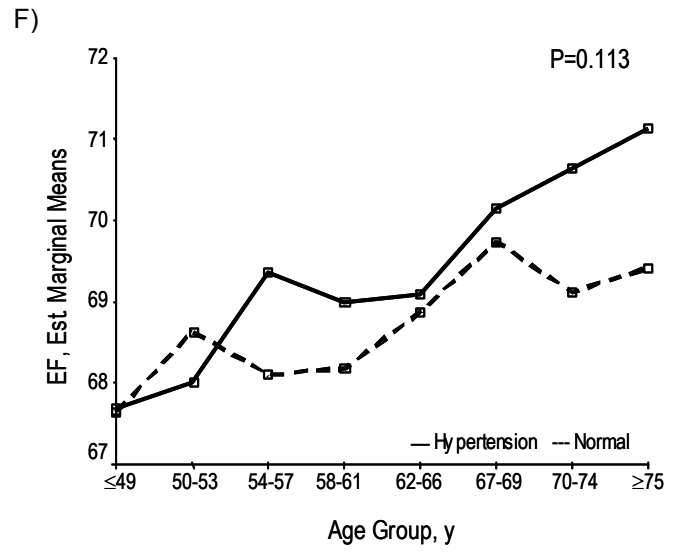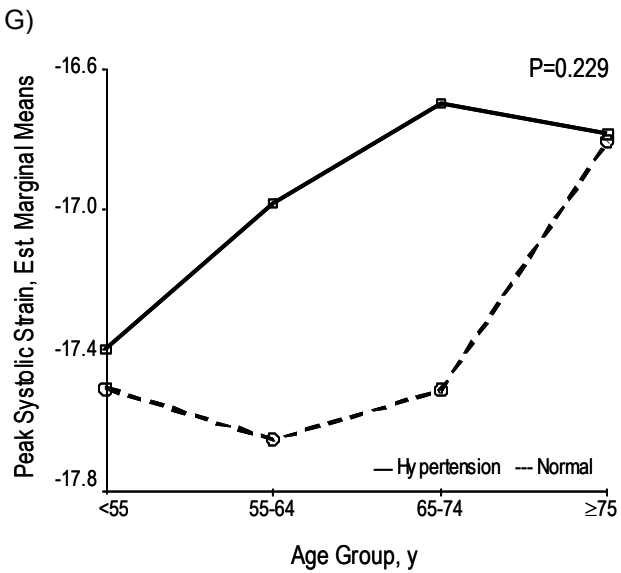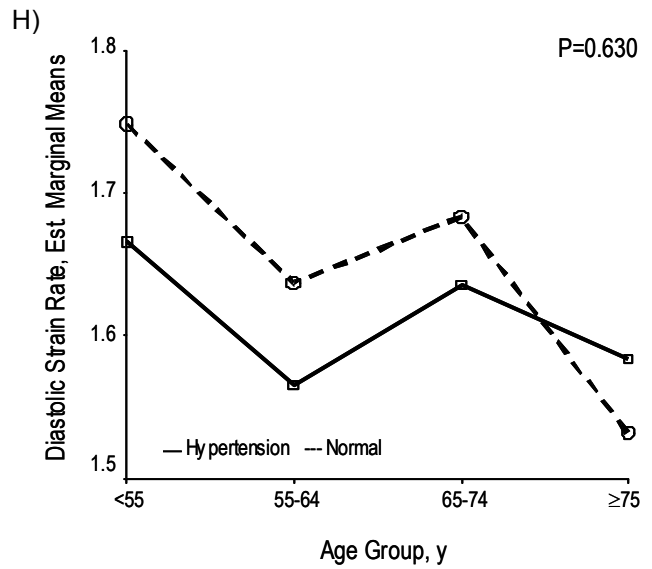

Supplement: NIHMS126606-supplement-1.pdf [file NIHMS126606-supplement-1.pdf]
